# Supplementary material for: The Novel Action of miR-193b-3p/CDK1 Signaling in HCC Proliferation and Migration: A Study Based on Bioinformatic Analysis and Experimental Investigation
Source: Hindawi journal article supplement (doi:10.1155/2022/8755263), 2022-12-13
Supplement: f1 [file 8755263.f1.pdf]

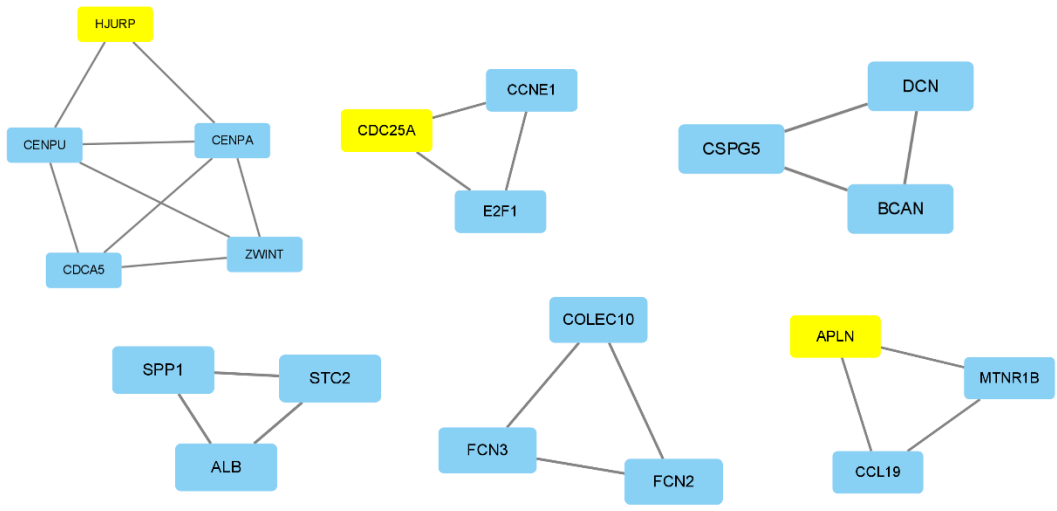

Supplemental Figure S1. Submodule PPI network as determined by MCODE.
